# Supplementary material for: Long-term outcomes of transoral incisionless fundoplication for gastro-esophageal reflux disease: systematic-review and meta-analysis
Source: PubMed Central journal article supplement — Endosc Int Open. 2021 Feb 3;9(2):E239–46. doi: 10.1055/a-1322-2209 (PMC7857958; doi:10.1055/a-1322-2209), 2021-02-03
Supplement: 2052supmat_10-1055-a-1322-2209.pdf [file 2052supmat_10-1055-a-1322-2209.pdf]

## Supplementary material

Supplementary Table 1. IHE quality assessment checklist for prospective studies.

|                                                                                                                | Witte-<br>man<br>PBL et al.<br>2012 [12] | Muls V<br>et al.<br>2013<br>[11] | Roy-<br>shapira<br>A et al.<br>2015<br>[13] | Kim<br>HJ et<br>al.<br>2016<br>[14] | Stefanidis<br>G et al.<br>2017 [16] | Trad<br>KS et<br>al.<br>2018<br>[15] | Chimukangara<br>M et al. 2019<br>[18] | Testoni<br>PA et al.<br>2019<br>[17] |
|----------------------------------------------------------------------------------------------------------------|------------------------------------------|----------------------------------|---------------------------------------------|-------------------------------------|-------------------------------------|--------------------------------------|---------------------------------------|--------------------------------------|
| <b>Study objective</b>                                                                                         |                                          |                                  |                                             |                                     |                                     |                                      |                                       |                                      |
| Is the hypothesis/aim/objective of the study clearly stated in the abstract, introduction, or methods section? | +                                        | +                                | +                                           | +                                   | +                                   | +                                    | +                                     | +                                    |
| <b>Study population</b>                                                                                        |                                          |                                  |                                             |                                     |                                     |                                      |                                       |                                      |
| Are the characteristics of the participants included in the study described?                                   | +                                        | +                                | +                                           | +                                   | +                                   | +                                    | +                                     | +                                    |
| Were the cases collected in more than one center?                                                              | +                                        | +                                | +                                           | +                                   | +                                   | +                                    | +                                     | +                                    |
| Are the eligibility criteria (inclusion and exclusion criteria) to enter the study explicit and appropriate?   | +                                        | +                                | +                                           | +                                   | +                                   | +                                    | +                                     | +                                    |
| Were participants recruited consecutively?                                                                     | +                                        | +                                | +                                           | +                                   | +                                   | +                                    | +                                     | +                                    |
| Did participants enter the study at a similar point in the disease?                                            | +                                        | +                                | +                                           | +                                   | +                                   | +                                    | +                                     | +                                    |
| <b>Intervention and co-intervention</b>                                                                        |                                          |                                  |                                             |                                     |                                     |                                      |                                       |                                      |
| Was the intervention clearly described in the study?                                                           | +                                        | +                                | +                                           | +                                   | +                                   | +                                    | +                                     | +                                    |
| Were additional interventions (cointerventions) clearly reported in the study?                                 | +                                        | +                                | +                                           | +                                   | +                                   | +                                    | +                                     | +                                    |
| <b>Outcome measures</b>                                                                                        |                                          |                                  |                                             |                                     |                                     |                                      |                                       |                                      |
| Are the outcome measures clearly defined in the introduction or methods section?                               | +                                        | +                                | +                                           | +                                   | +                                   | +                                    | +                                     | +                                    |
| Were relevant outcomes appropriately measured with objective and/or subjective methods?                        | +                                        | +                                | +                                           | +                                   | +                                   | +                                    | +                                     | +                                    |
| Were outcomes measured before and after intervention?                                                          | +                                        | +                                | +                                           | +                                   | +                                   | +                                    | +                                     | +                                    |
| <b>Statistical analysis</b>                                                                                    |                                          |                                  |                                             |                                     |                                     |                                      |                                       |                                      |
| Were the statistical tests used to assess the relevant outcomes appropriate?                                   | +                                        | +                                | +                                           | +                                   | +                                   | +                                    | +                                     | +                                    |
